# Supplementary material for: A vacuum ultraviolet ion source (VUV-IS) for iodide–chemical ionization mass spectrometry: a substitute for radioactive ion sources
Source: Copernicus journal article supplement (doi:10.5194/amt-13-3683-2020), 2020-07-09
Supplement: Supplementary file 1 [file amt-13-3683-2020-supplement.pdf]

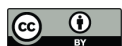

## *Supplement of*

# **A vacuum ultraviolet ion source (VUV-IS) for iodide–chemical ionization mass spectrometry: a substitute for radioactive ion sources**

**Yi Ji et al.**

*Correspondence to:* L. Gregory Huey ([greg.huey@eas.gatech.edu](mailto:greg.huey@eas.gatech.edu))

The copyright of individual parts of the supplement might differ from the CC BY 4.0 License.

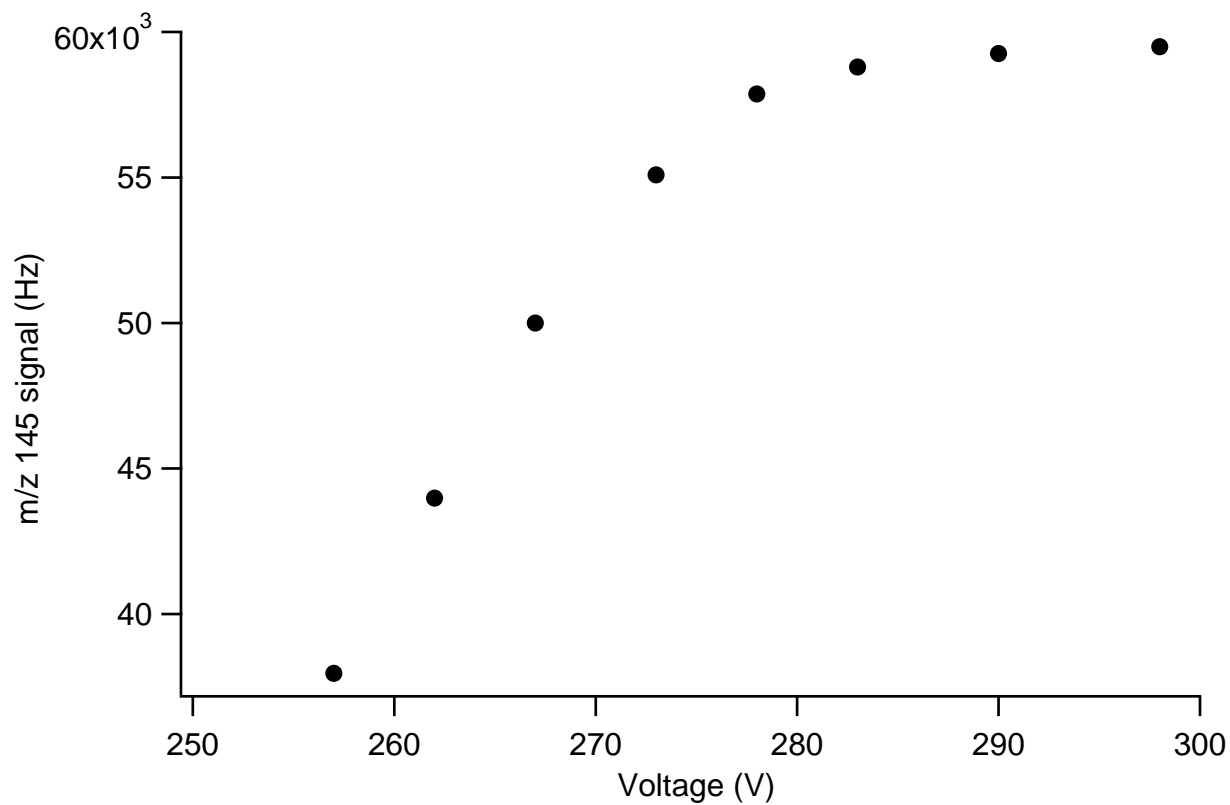

**Figure S1.** CIMS ion current at m/z 145 ( $\text{I}^- \cdot \text{H}_2\text{O}$ ) as a function of voltage across the krypton. Note that the lamp ignites at voltage of ~280 V.

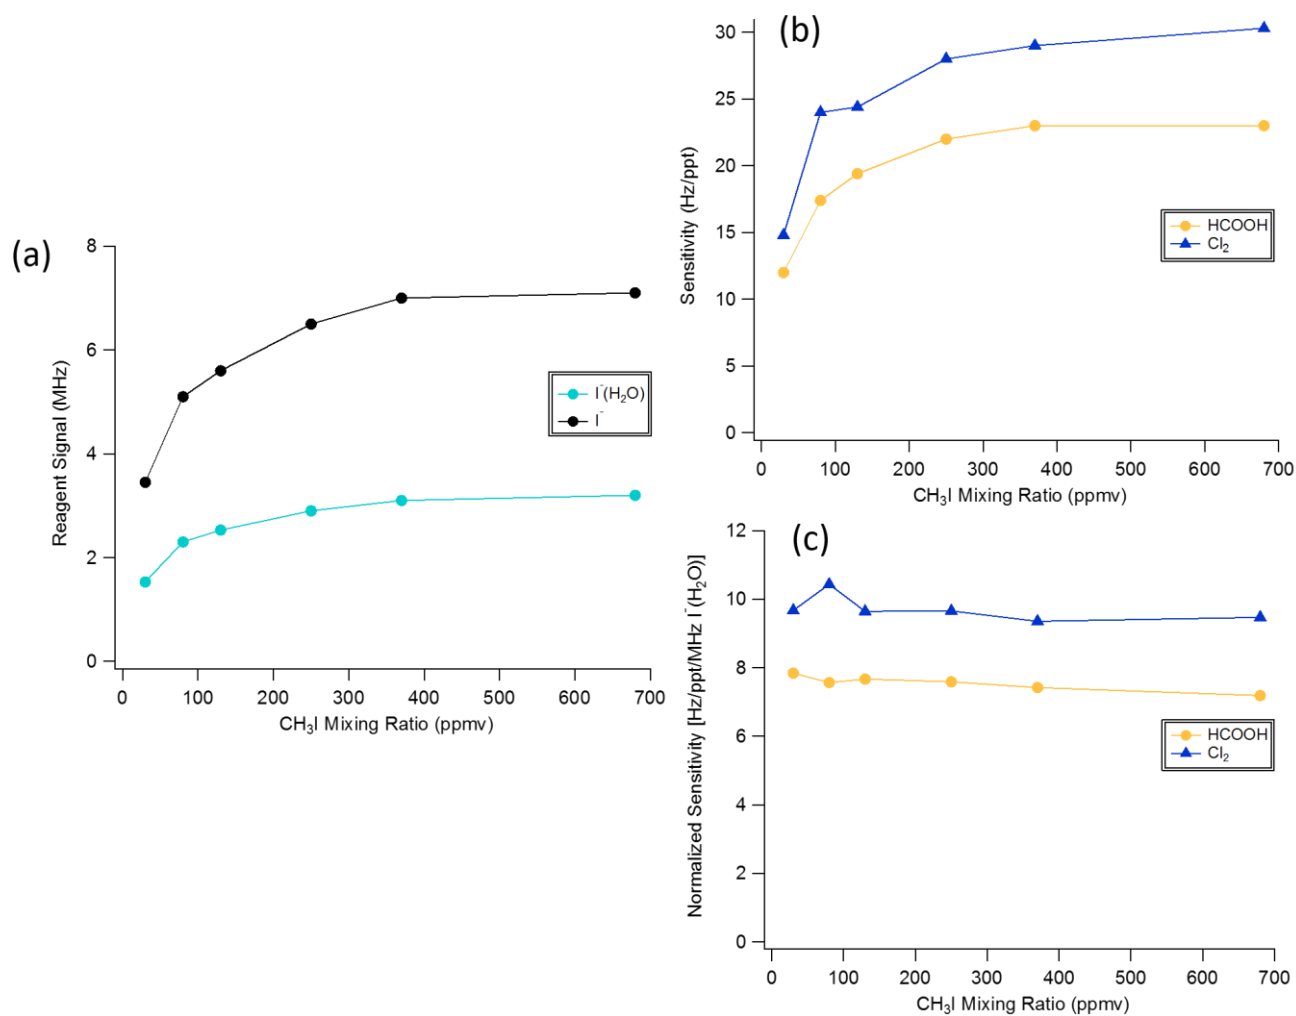

**Figure S2.** TOF-CIMS (a) reagent signal levels (b) sensitivity (c) normalized sensitivity as a function of  $\text{CH}_3\text{I}$  at 30 torr.

## Peroxyacetyl nitrate (PAN) measurements using I<sup>-</sup>-Q-CIMS

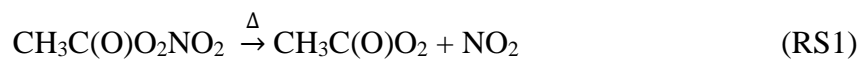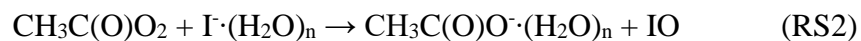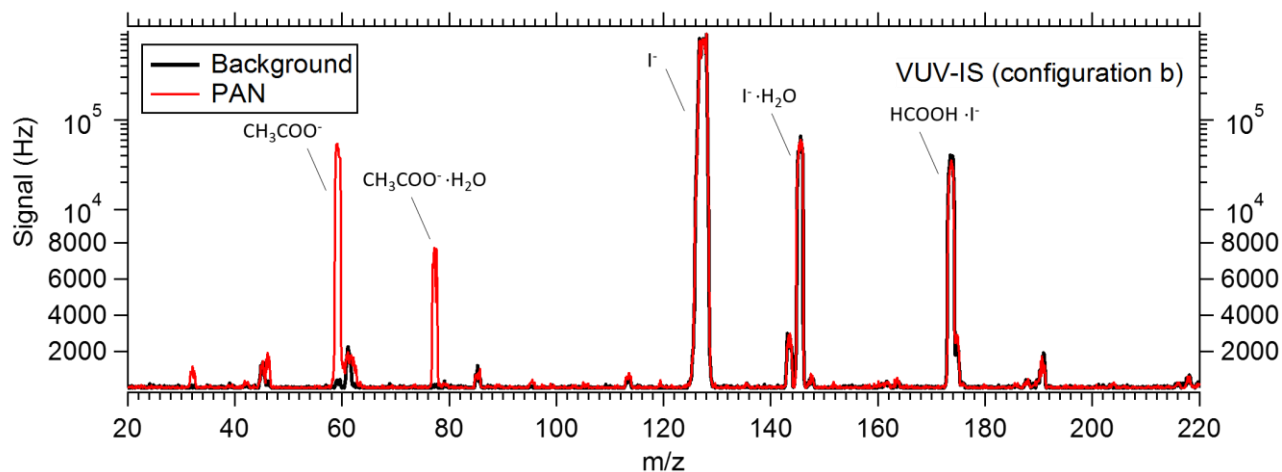

**Figure S3.** Mass spectra of zeroed ambient air with and without PAN calibration standard.

## Organic acids measurements using $\text{SF}_6^-$ -Q-CIMS

Detection of formic and acetic acid by the following reactions with  $\text{SF}_6^-$  (Nah et al., 2018).

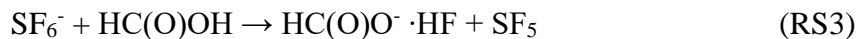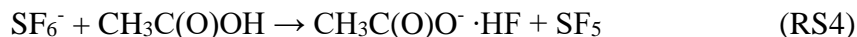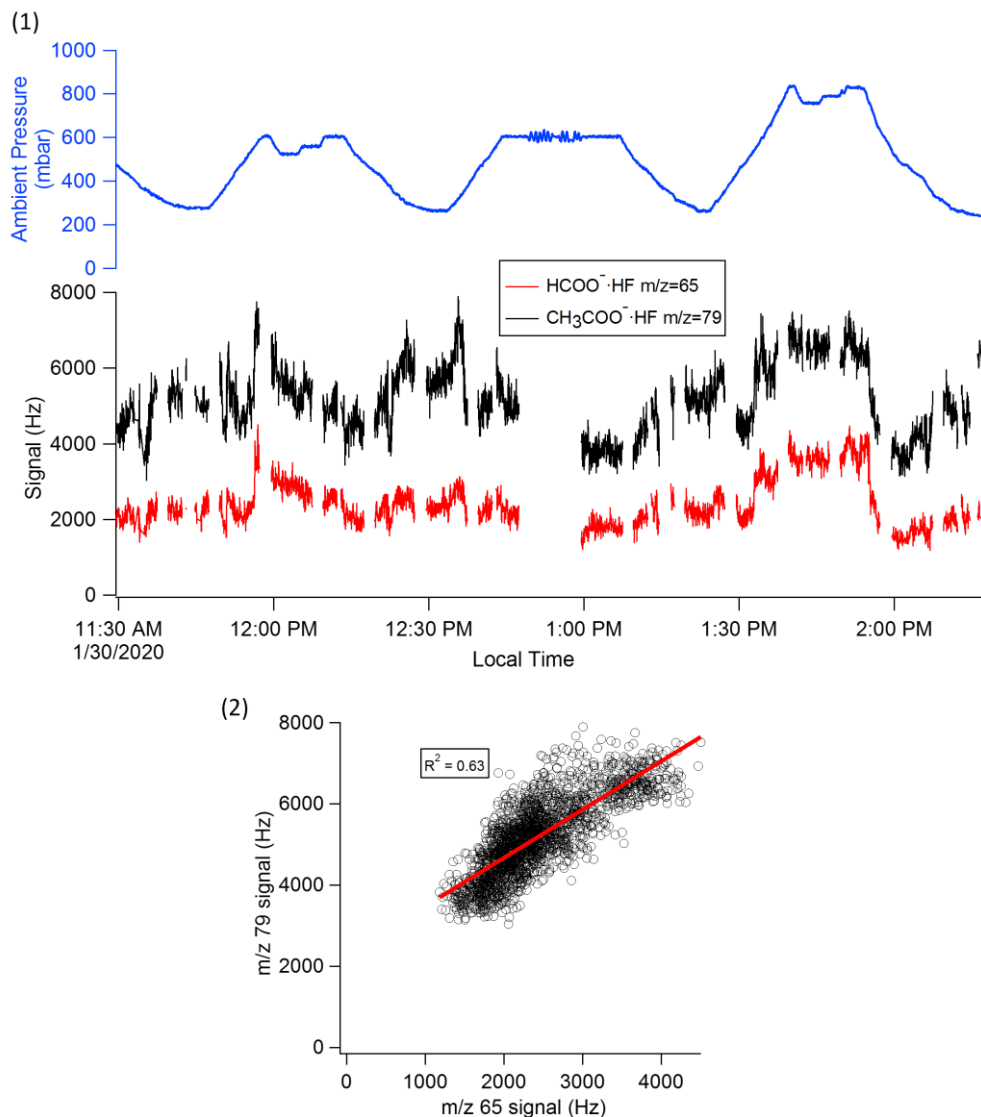

**Figure S4.** (1) Time series of formic acid signal ( $\text{HCOO}^- \cdot \text{HF}$ ,  $m/z$  65, red line), acetic acid signal ( $\text{CH}_3\text{COO}^- \cdot \text{HF}$ ,  $m/z$  79, black line), and ambient pressure (blue line). (2) A correlation plot of the  $\text{CH}_3\text{COO}^- \cdot \text{HF}$  signal ( $m/z$  79) versus  $\text{HCOO}^- \cdot \text{HF}$  signal ( $m/z$  65). Data was taken from the NCAR GV during a test flight based out of Broomfield, CO using a VUV-IS.

## Sample Calculation of Absorption of VUV light by CH<sub>3</sub>I

To calculate how much of the VUV light is absorbed, the Beer-Lambert Law is applied,

$$\frac{I(\lambda)}{I_0(\lambda)} = \exp(-\sigma(\lambda)nL)$$

where  $I(\lambda)$  is the intensity of light at wavelength  $\lambda$  after absorption,  $I_0(\lambda)$  is the original light intensity at wavelength  $\lambda$ ,  $\sigma(\lambda)$  is the absorption cross section of the absorber molecule at wavelength  $\lambda$ ,  $n$  is number concentration of the absorber molecule, and  $L$  is the path length over which the light can be absorbed.

Sample calculation:

For 86.5 ppmv of CH<sub>3</sub>I at a pressure of 20 torr

$$n = 5.70 \times 10^{13} \text{ molecule cm}^{-3}$$

$$\sigma(\lambda) = 7 \times 10^{-17} \text{ cm}^2 \text{ molecule}^{-1} \text{ (Olney et al., 1998)}$$

$$L = 21 \text{ cm}$$

$$\frac{I(\lambda)}{I_0(\lambda)} = \exp(-\sigma(\lambda)nL) = 0.92$$

Therefore, in this example ~8% of the light emitted from the VUV lamp is absorbed by the methyl iodide.
